# Supplementary material for: Pivotal Role of Innate and Adaptive Immunity in Anthracycline Chemotherapy of Established Tumors
Source: Oxford University Press journal article supplement (doi:10.1158/0008-5472.can-11-0753), 2011-06-06
Supplement: 00085472can110753-sup-fl_1-4.pdf [file 00085472can110753-sup-fl_1-4.pdf]

## Supplementary Figures

### **Supplementary Figure 1. OVA-expressing AT3 tumor cells are highly immunogenic.**

Wildtype C57BL/6 mice were inoculated s.c. with  $1 \times 10^6$  AT3 tumor cells expressing OVA (AT3<sup>OVA</sup>) or equivalent AT3 tumor cells containing empty vector (AT3<sup>EV</sup>). On day 17 all mice were intratumoral (i.t.) treated with doxorubicin (1 mM) or PBS and tumor growth was measured as indicated. Data represent means of 5 mice per group  $\pm$  standard errors.

### **Supplementary Figure 2. Doxorubicin therapy partially requires IL-12, but not IL-23.**

Groups of 5 syngeneic B6 WT or gene-targeted mice as indicated were injected subcutaneously with (A)  $5 \times 10^5$  AT3 mammary adenocarcinoma cells, (B)  $5 \times 10^5$  EO771 mammary adenocarcinoma cells, or (C)  $8 \times 10^5$  MCA205 fibrosarcoma cells. Mice then received either intratumor PBS or DOX (50  $\mu$ l, 2 mM) on (A) day 7, (B) day 14, and (C) day 7 after tumor inoculation. Some mice received cIg or anti-IL-23p19 (500  $\mu$ g i.p.) on day 6, 7, 14 and 21 after tumor inoculation. Tumor size was measured as indicated. Data shows means of 5 mice per group  $\pm$  standard errors, **representative of two independent experiments**. Statistical analyses were performed at the time point indicated on the figure using Mann-Whitney test (\* $p < 0.05$ ; \*\* $p < 0.01$ ; ns = not significant).

### **Supplementary Figure 3. Doxorubicin therapy requires $\gamma\delta$ T cells, but not type I NKT cells.**

Groups of 5 syngeneic WT or gene-targeted mice as indicated were injected subcutaneously with (A)  $5 \times 10^5$  AT3 mammary adenocarcinoma cells or (B)  $8 \times 10^5$  MCA205 fibrosarcoma cells.

Mice then received either intratumor PBS or DOX (50  $\mu$ l, 2 mM) on day 7 after tumor inoculation. Tumor size was measured as indicated. Data shows means of 5 mice per group  $\pm$  standard errors, representative of two independent experiments. Statistical analyses were performed at the time point indicated on the figure using Mann-Whitney test (\*\*p<0.01; ns = not significant).

**Supplementary Figure 4. Growth rates of MCA-induced de novo tumors.** Groups of 15-30 male BALB/c WT mice were injected s.c. on the flank with 400  $\mu$ g MCA on day 0. When sarcomas had established (the second week of palpable tumor – 0.20-0.45 cm<sup>2</sup>) BALB/c mice received either intratumor PBS or DOX (50  $\mu$ l, 2 mM) once a week for 2 weeks. Mice received control Ig (anti-agp3), anti-CD8 $\alpha$ , anti-IFN- $\gamma$ , anti-IL-1 $\beta$ , anti-IL-17RA or anti-IL-23p19 (100-500  $\mu$ g i.p.) as indicated, on day -1, 0 and weekly thereafter for 6 weeks relative to initial PBS/DOX treatment. Mice were then monitored for tumor development over 250 days and average tumor growth (mm<sup>2</sup>) per day of individual mice was calculated from first measurement to last. Mean  $\pm$  SEM bars are shown with p values for efficacy of DOX in each host setting shown above, calculated using Mann-Whitney test.
