# Supplementary material for: Pivotal Role of Innate and Adaptive Immunity in Anthracycline Chemotherapy of Established Tumors
Source: Oxford University Press journal article supplement (doi:10.1158/0008-5472.can-11-0753), 2011-06-06
Supplement: 00085472can110753-sup-stab_1.pdf [file 00085472can110753-sup-stab_1.pdf]

**\*Supplementary Table 1.**

Clinical information of breast cancer patient cohorts used for gene expression analysis.

| <b>Variable</b>                             | <b>Cohort 1 N=1062 (100%)</b> | <b>Cohort 2 N=114 (100%)</b>                                                 |
|---------------------------------------------|-------------------------------|------------------------------------------------------------------------------|
| <b>Age</b>                                  |                               |                                                                              |
| ≤50 yrs                                     | 615 (56.6%)                   | 69 (60.5%)                                                                   |
| >50yrs                                      | 414 (38.1%)                   | 45 (39.5%)                                                                   |
| unknown                                     | 58 (5.3%)                     |                                                                              |
| <b>Tumor size</b>                           |                               |                                                                              |
| T1 ≤2cm                                     | 679 (62.5%)                   | 20 (14.4%)                                                                   |
| T2 >2cm                                     | 346 (31.8%)                   | 98 (85.6%)                                                                   |
| unknown                                     | 58 (5.3%)                     |                                                                              |
| <b>Nodal Status</b>                         |                               |                                                                              |
| Node negative                               | 932 (85.7%)                   | 52 (45.6%)                                                                   |
| Node positive                               | 155 (14.3%)                   | 62 (54.3%)                                                                   |
| <b>Histologic Grade</b>                     |                               |                                                                              |
| Grade 1                                     | 148 (13.6%)                   | 2 (1.8%)                                                                     |
| Grade 2                                     | 373 (34.3%)                   | 20 (17.5%)                                                                   |
| Grade 3                                     | 417 (38.4%)                   | 76.3 (76.3%)                                                                 |
| Unknown                                     | 149 (13.7%)                   | 5 (4.4%)                                                                     |
| <b>ER status</b>                            |                               |                                                                              |
| Positive                                    | 761 (70%)                     | 0                                                                            |
| Negative                                    | 326 (30%)                     | 114 (114%)                                                                   |
| <b>HER2 overexpressed</b>                   |                               |                                                                              |
| Positive                                    | 162 (15%)                     | 29 (25.4%)                                                                   |
| Negative                                    | 921 (84.7%)                   | 85 (74.6%)                                                                   |
| unknown                                     | 4 (0.4%)                      |                                                                              |
| <b>Endpoint</b>                             | Disease recurrence (28.6%)    | pCR (14%)                                                                    |
| <b>Type of tumor biopsy</b>                 | At primary surgery            | At diagnosis (core biopsy)                                                   |
| <b>Systemic anti cancer treatment given</b> | none                          | Epirubicin monotherapy<br>4 cycles (100 mg/m <sup>2</sup> ) prior to surgery |

\*This table is in part reproduced in Ref 27.
