# Supplementary figures and images for: Pivotal Role of Innate and Adaptive Immunity in Anthracycline Chemotherapy of Established Tumors
Source: Oxford University Press journal article supplement (doi:10.1158/0008-5472.can-11-0753), 2011-06-06

Mattarollo et al. Supplementary Figure 1

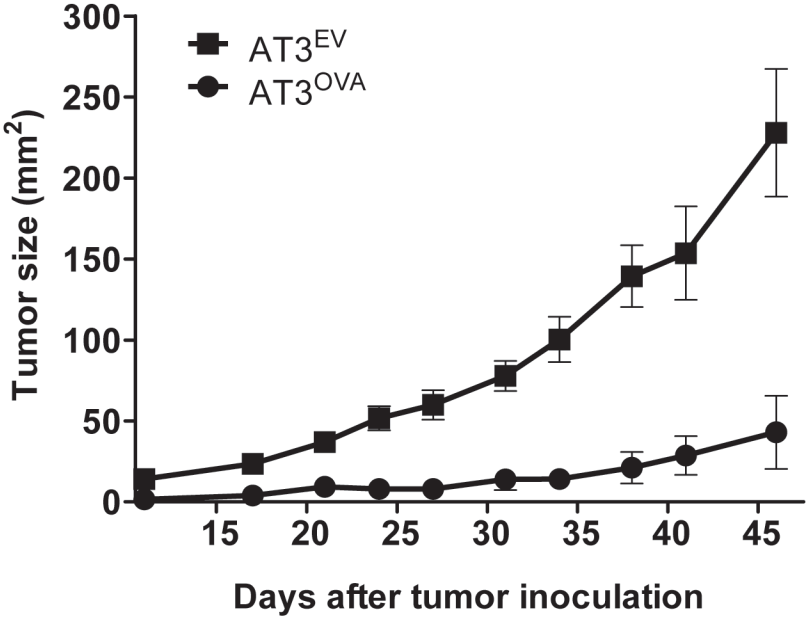

Supplement: 00085472can110753-sup-sfig_1.pdf [file 00085472can110753-sup-sfig_1.pdf]

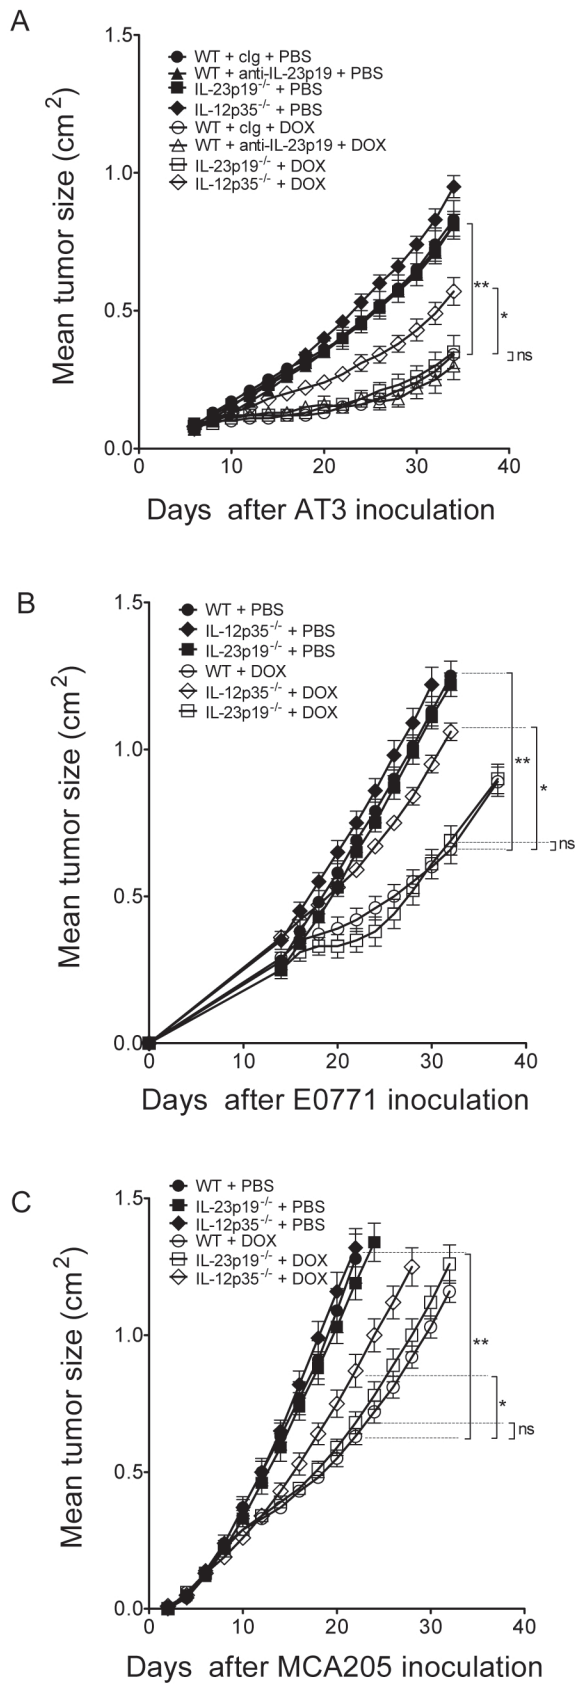

Supplement: 00085472can110753-sup-sfig_2.pdf [file 00085472can110753-sup-sfig_2.pdf]

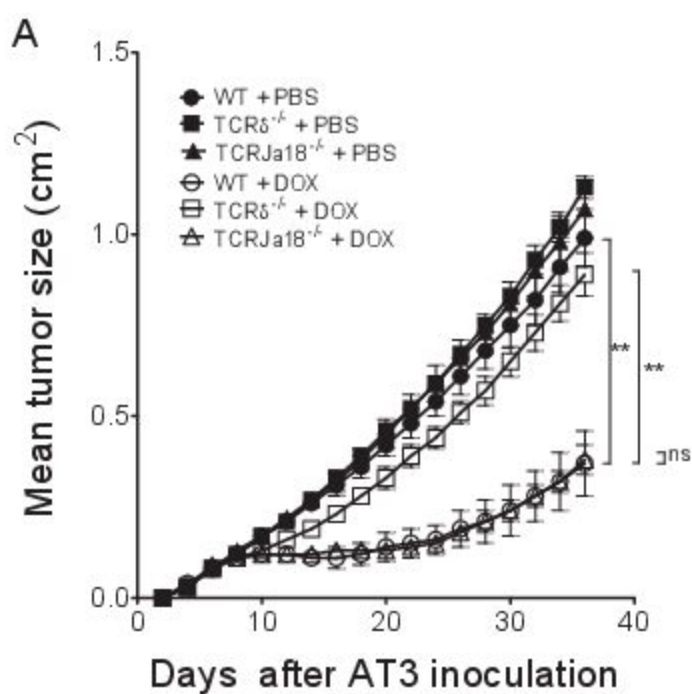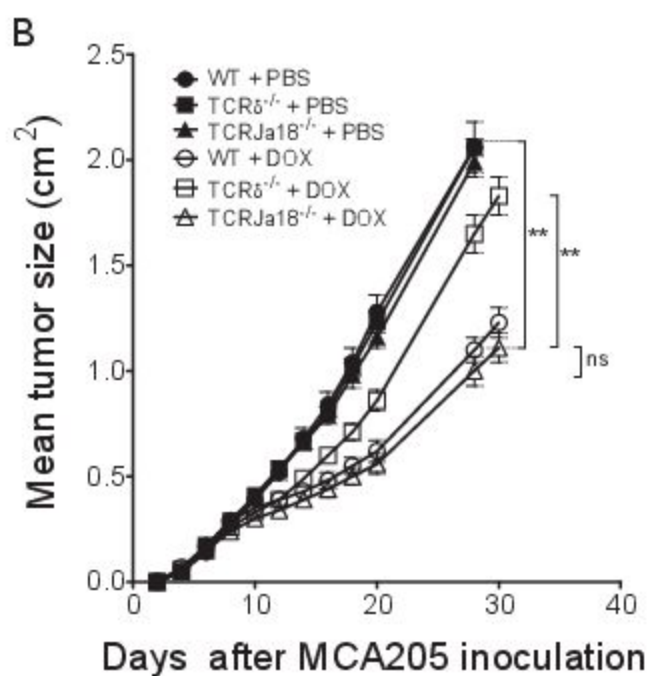

Supplement: 00085472can110753-sup-sfig_3.pdf [file 00085472can110753-sup-sfig_3.pdf]

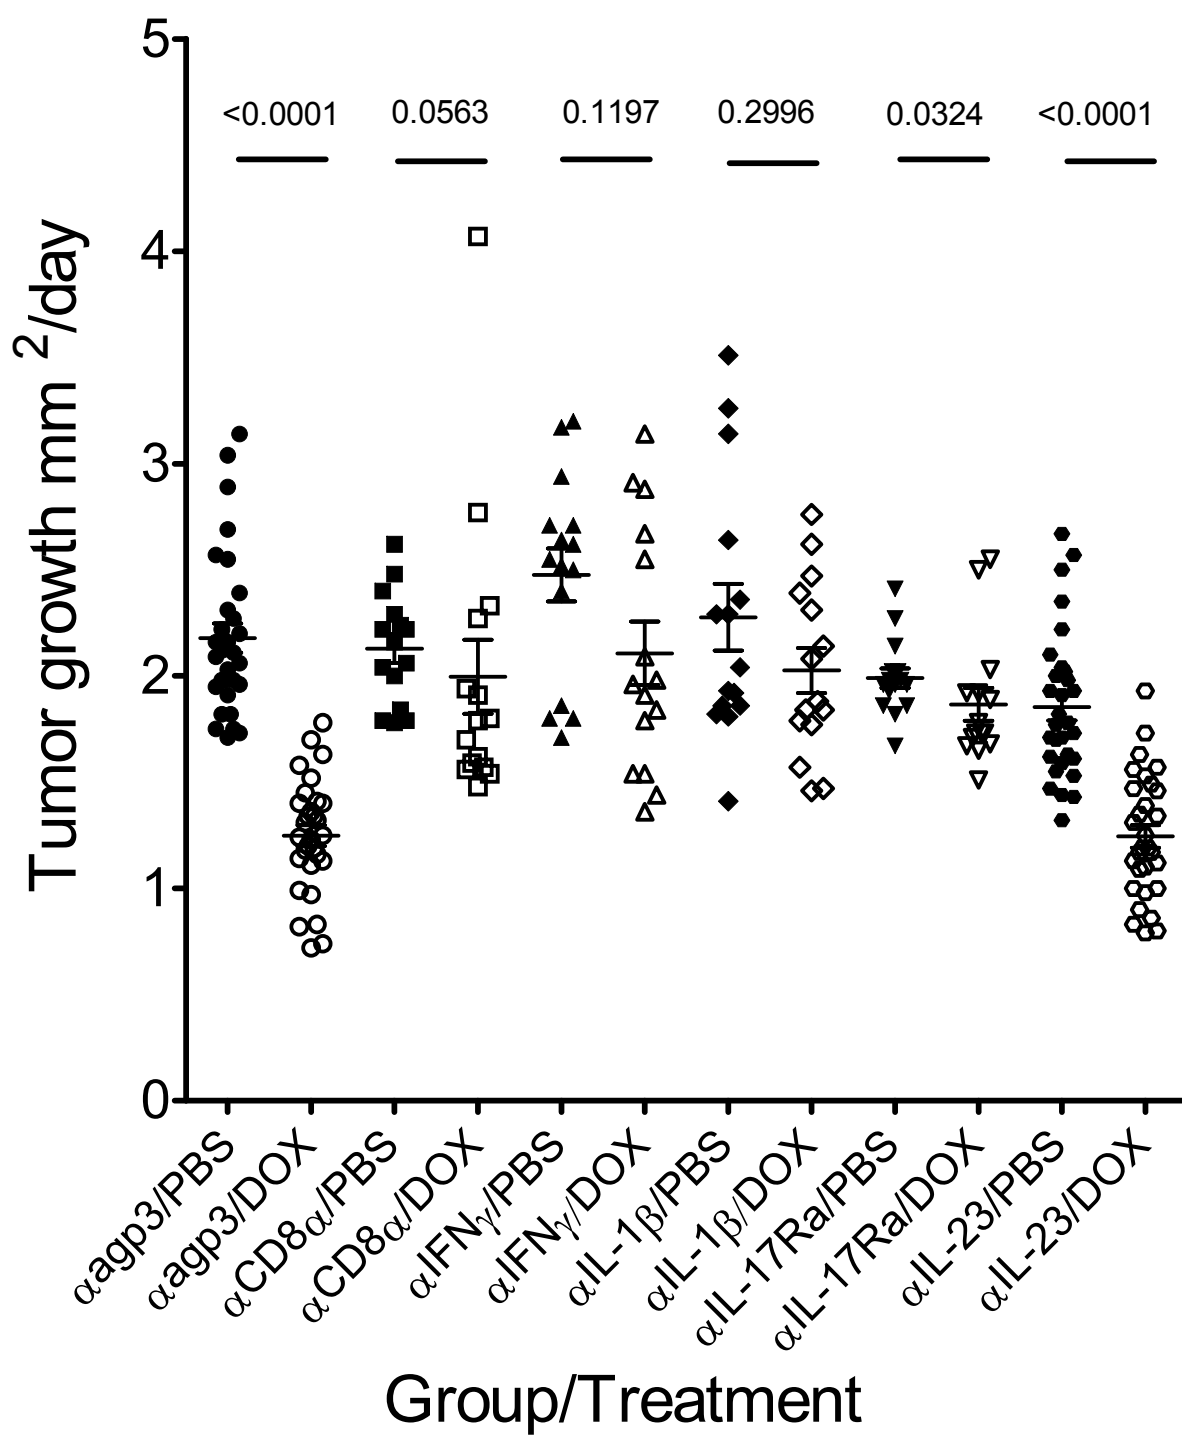

Supplement: 00085472can110753-sup-sfig_4.pdf [file 00085472can110753-sup-sfig_4.pdf]
